# Supplementary material for: Liver Lipidomics Analysis Revealed the Novel Ameliorative Mechanisms of L-Carnitine on High-Fat Diet-Induced NAFLD Mice
Source: MDPI journal article supplement (doi:10.3390/nu15061359), 2023-03-10
Supplement: s1 [file s1]

## Supplemental Tables

### Abbreviations of lipids

Cer, ceramide; CE, cholesteric esters; Co, coenzyme; DG, diacylglycerol; TG, triacylglycerol; PC, phosphatidylcholine; LPC, lyso-phosphatidylcholine; PE, phosphatidylethanolamine; LPE, lyso-phosphatidylethanolamine; PI, phosphatidylinositol; PS, phosphatidylserine; SM, sphingomyelin

**Supplementary Table S1.** Peak areas of all the identified hepatic lipid species.

| Lipid species   | Con ( $\times 10^4$ ) |              | HF ( $\times 10^4$ ) |              | LC5 ( $\times 10^4$ ) |              |
|-----------------|-----------------------|--------------|----------------------|--------------|-----------------------|--------------|
|                 | Mean                  | SD           | Mean                 | SD           | Mean                  | SD           |
| Cer(d18:1_16:0) | 5.08                  | $\pm 1.33$   | 2.64                 | $\pm 0.79$   | 5.71                  | $\pm 2.62$   |
| Cer(d18:1_22:0) | 15.41                 | $\pm 6.03$   | 8.39                 | $\pm 2.52$   | 7.80                  | $\pm 1.26$   |
| Cer(d18:1_24:0) | 14.30                 | $\pm 5.87$   | 3.46                 | $\pm 1.17$   | 4.66                  | $\pm 1.59$   |
| Cer(d18:1_24:1) | 20.32                 | $\pm 5.87$   | 5.71                 | $\pm 1.87$   | 8.68                  | $\pm 3.25$   |
| CE(18:1)        | 4.95                  | $\pm 2.22$   | 5.92                 | $\pm 2.63$   | 7.36                  | $\pm 4.53$   |
| CE(18:2)        | 5.91                  | $\pm 3.26$   | 0.13                 | $\pm 0.16$   | 1.28                  | $\pm 0.58$   |
| Co(Q9)          | 15.14                 | $\pm 1.87$   | 7.08                 | $\pm 1.52$   | 8.28                  | $\pm 1.95$   |
| DG(16:0_18:1)   | 25.76                 | $\pm 10.51$  | 53.08                | $\pm 10.72$  | 27.37                 | $\pm 11.69$  |
| DG(16:0_18:2)   | 64.51                 | $\pm 25.68$  | 60.29                | $\pm 10.84$  | 29.60                 | $\pm 7.57$   |
| DG(16:0_22:6)   | 4.56                  | $\pm 1.50$   | 4.11                 | $\pm 0.79$   | 3.55                  | $\pm 0.48$   |
| DG(18:0_16:0)   | 14.97                 | $\pm 4.67$   | 8.13                 | $\pm 2.26$   | 6.73                  | $\pm 1.09$   |
| DG(18:0_20:4)   | 25.04                 | $\pm 5.28$   | 18.04                | $\pm 5.11$   | 16.18                 | $\pm 8.69$   |
| DG(18:1_18:1)   | 35.94                 | $\pm 11.56$  | 87.52                | $\pm 18.70$  | 42.22                 | $\pm 17.37$  |
| DG(18:1_18:2)   | 72.02                 | $\pm 25.56$  | 73.08                | $\pm 17.29$  | 38.87                 | $\pm 10.43$  |
| DG(18:1_20:4)   | 9.64                  | $\pm 1.79$   | 16.43                | $\pm 3.61$   | 8.94                  | $\pm 2.93$   |
| DG(18:1_22:6)   | 20.35                 | $\pm 8.71$   | 12.96                | $\pm 6.73$   | 8.42                  | $\pm 2.82$   |
| DG(18:2_18:2)   | 31.22                 | $\pm 14.27$  | 17.92                | $\pm 6.22$   | 8.18                  | $\pm 1.65$   |
| DG(18:2_22:6)   | 19.98                 | $\pm 9.91$   | 4.40                 | $\pm 2.62$   | 4.16                  | $\pm 0.83$   |
| LPC(15:0)       | 48.68                 | $\pm 12.42$  | 27.52                | $\pm 10.77$  | 24.53                 | $\pm 13.96$  |
| LPC(16:0)       | 171.90                | $\pm 36.52$  | 80.45                | $\pm 27.62$  | 75.24                 | $\pm 37.17$  |
| LPC(18:0)       | 57.51                 | $\pm 11.90$  | 41.85                | $\pm 13.28$  | 44.71                 | $\pm 19.28$  |
| LPC(18:1)       | 11.20                 | $\pm 3.37$   | 9.65                 | $\pm 2.91$   | 12.32                 | $\pm 6.39$   |
| LPC(18:2)       | 61.53                 | $\pm 18.23$  | 18.01                | $\pm 9.38$   | 19.38                 | $\pm 9.54$   |
| LPC(20:4)       | 30.54                 | $\pm 8.79$   | 21.89                | $\pm 8.28$   | 23.28                 | $\pm 13.32$  |
| LPC(22:6)       | 32.90                 | $\pm 12.12$  | 15.77                | $\pm 7.04$   | 18.22                 | $\pm 11.84$  |
| LPE(16:0)       | 29.91                 | $\pm 9.03$   | 12.29                | $\pm 5.33$   | 11.95                 | $\pm 6.77$   |
| LPE(18:1)       | 16.66                 | $\pm 4.51$   | 7.09                 | $\pm 3.01$   | 5.03                  | $\pm 3.06$   |
| LPE(20:4)       | 10.42                 | $\pm 3.33$   | 6.33                 | $\pm 2.39$   | 6.62                  | $\pm 3.98$   |
| LPE(22:6)       | 16.08                 | $\pm 6.61$   | 6.26                 | $\pm 2.78$   | 6.93                  | $\pm 4.98$   |
| PC(16:0_18:1)   | 293.14                | $\pm 34.31$  | 274.16               | $\pm 84.56$  | 383.77                | $\pm 86.41$  |
| PC(17:1_20:5)   | 121.04                | $\pm 22.65$  | 57.79                | $\pm 15.21$  | 92.94                 | $\pm 9.10$   |
| PC(18:0_18:2)   | 285.02                | $\pm 56.06$  | 140.05               | $\pm 39.93$  | 191.02                | $\pm 53.16$  |
| PC(18:0_20:3)   | 38.16                 | $\pm 6.38$   | 40.02                | $\pm 12.16$  | 26.28                 | $\pm 3.55$   |
| PC(32:0)        | 65.41                 | $\pm 7.26$   | 24.74                | $\pm 6.63$   | 32.75                 | $\pm 7.82$   |
| PC(32:1)        | 32.96                 | $\pm 5.77$   | 19.29                | $\pm 4.52$   | 23.68                 | $\pm 6.21$   |
| PC(34:0)        | 13.08                 | $\pm 2.81$   | 7.89                 | $\pm 2.55$   | 7.41                  | $\pm 2.17$   |
| PC(34:2)        | 1303.76               | $\pm 183.18$ | 393.99               | $\pm 111.17$ | 785.62                | $\pm 279.87$ |

|                    |        |         |        |        |        |         |
|--------------------|--------|---------|--------|--------|--------|---------|
| PC(34:3)           | 82.53  | ±9.81   | 16.05  | ±4.58  | 18.55  | ±5.64   |
| PC(35:2)           | 10.97  | ±3.25   | 3.97   | ±1.31  | 6.21   | ±1.43   |
| PC(35:4)           | 273.73 | ±55.28  | 173.24 | ±38.59 | 279.83 | ±36.03  |
| PC(36:1)           | 43.85  | ±7.28   | 44.75  | ±12.31 | 42.67  | ±8.66   |
| PC(36:3)           | 66.26  | ±9.98   | 99.18  | ±24.43 | 64.71  | ±30.50  |
| PC(36:4)           | 709.28 | ±176.05 | 494.83 | ±91.04 | 828.04 | ±133.08 |
| PC(36:5)           | 58.58  | ±11.56  | 12.12  | ±5.72  | 19.94  | ±11.94  |
| PC(37:5)           | 2.34   | ±0.27   | 2.58   | ±0.92  | 6.37   | ±1.30   |
| PC(38:4)           | 221.19 | ±53.78  | 222.87 | ±30.23 | 332.68 | ±72.19  |
| PC(38:5)           | 161.46 | ±36.75  | 103.94 | ±17.20 | 162.18 | ±34.90  |
| PC(38:6)           | 707.22 | ±102.20 | 379.80 | ±66.33 | 676.11 | ±89.31  |
| PC(40:5)           | 2.00   | ±0.34   | 4.02   | ±1.37  | 8.21   | ±2.69   |
| PC(40:6))          | 97.33  | ±19.12  | 67.82  | ±11.48 | 106.79 | ±24.32  |
| PC(40:7)           | 132.47 | ±23.72  | 62.99  | ±13.32 | 91.94  | ±17.97  |
| PC(40:8)           | 32.44  | ±7.58   | 11.52  | ±3.85  | 15.08  | ±6.14   |
| PC(42:10)          | 6.32   | ±1.80   | 3.39   | ±1.62  | 5.13   | ±3.74   |
| PE(16:0_18:2)      | 68.62  | ±7.02   | 18.83  | ±6.35  | 33.08  | ±8.23   |
| PE(16:0_20:4)      | 106.77 | ±21.05  | 56.56  | ±12.75 | 102.02 | ±19.53  |
| PE(16:0_22:6)      | 290.29 | ±35.71  | 153.16 | ±34.86 | 280.07 | ±39.08  |
| PE(16:0p_22:6)     | 7.82   | ±0.87   | 2.44   | ±0.68  | 5.24   | ±1.41   |
| PE(18:0_18:2)      | 51.23  | ±9.53   | 18.71  | ±6.22  | 24.84  | ±4.90   |
| PE(18:0p_20:4)     | 11.79  | ±2.42   | 8.52   | ±2.02  | 13.47  | ±3.39   |
| PE(18:1_18:2)      | 55.67  | ±10.08  | 14.43  | ±6.16  | 15.95  | ±4.95   |
| PE(18:1_20:4)      | 121.91 | ±26.99  | 69.60  | ±14.22 | 116.70 | ±22.04  |
| PE(18:1_22:6)      | 81.15  | ±11.67  | 37.76  | ±9.84  | 57.01  | ±7.54   |
| PI(18:0_20:4)      | 53.45  | ±9.17   | 32.14  | ±5.89  | 53.80  | ±9.49   |
| PS(18:0_20:4)      | 14.08  | ±3.62   | 8.88   | ±4.42  | 22.05  | ±16.42  |
| SM(d18:1_22:0)     | 94.11  | ±18.39  | 56.97  | ±14.45 | 56.89  | ±8.15   |
| SM(d18:1_24:1)     | 73.18  | ±9.68   | 25.72  | ±5.91  | 39.17  | ±9.94   |
| SM(d34:1)          | 30.25  | ±2.40   | 18.62  | ±4.79  | 38.15  | ±11.37  |
| SM(d38:1)          | 9.35   | ±1.22   | 8.59   | ±1.99  | 9.56   | ±0.96   |
| SM(d41:1)          | 23.11  | ±6.02   | 6.89   | ±1.73  | 8.38   | ±1.82   |
| SM(d42:1)          | 61.90  | ±12.74  | 14.11  | ±5.08  | 18.71  | ±6.04   |
| TG(15:0_14:0_16:0) | 29.89  | ±9.78   | 4.79   | ±1.70  | 19.97  | ±9.70   |
| TG(15:0_16:0_16:0) | 54.64  | ±11.89  | 9.50   | ±6.28  | 43.59  | ±14.29  |
| TG(15:0_16:0_16:1) | 63.36  | ±16.39  | 15.41  | ±6.34  | 49.31  | ±19.24  |
| TG(15:0_16:0_18:1) | 68.96  | ±9.06   | 26.31  | ±5.33  | 53.02  | ±16.57  |
| TG(15:0_16:1_16:1) | 30.90  | ±4.66   | 11.23  | ±2.48  | 18.58  | ±4.89   |
| TG(15:0_17:1_17:1) | 64.89  | ±6.22   | 22.63  | ±4.67  | 45.03  | ±15.80  |
| TG(15:0_18:1_18:1) | 45.89  | ±3.50   | 65.88  | ±12.48 | 50.28  | ±5.73   |
| TG(15:0_18:2_18:2) | 5.64   | ±2.01   | 9.76   | ±2.72  | 3.90   | ±0.58   |
| TG(16:0_14:0_16:0) | 60.99  | ±8.48   | 8.70   | ±4.06  | 46.65  | ±25.13  |
| TG(16:0_14:0_16:1) | 60.82  | ±13.95  | 20.87  | ±5.58  | 46.37  | ±20.30  |
| TG(16:0_16:0_16:0) | 80.20  | ±20.15  | 14.34  | ±8.30  | 62.13  | ±25.86  |
| TG(16:0_16:0_16:1) | 118.31 | ±28.78  | 39.79  | ±11.53 | 81.19  | ±40.04  |
| TG(16:0_16:0_17:0) | 31.95  | ±5.87   | 8.41   | ±5.39  | 27.24  | ±8.08   |
| TG(16:0_16:0_18:1) | 126.34 | ±59.55  | 134.19 | ±29.53 | 159.42 | ±46.44  |

|                    |        |         |        |        |        |         |
|--------------------|--------|---------|--------|--------|--------|---------|
| TG(16:0_16:1_16:1) | 82.49  | ±25.74  | 64.85  | ±20.71 | 66.47  | ±26.46  |
| TG(16:0_16:1_18:1) | 162.11 | ±87.97  | 266.94 | ±62.10 | 191.54 | ±45.64  |
| TG(16:0_17:0_18:1) | 29.10  | ±3.45   | 21.62  | ±4.22  | 28.01  | ±6.06   |
| TG(16:0_18:1_18:1) | 215.90 | ±102.31 | 838.31 | ±87.22 | 637.01 | ±205.30 |
| TG(16:0_18:1_18:2) | 316.02 | ±173.02 | 832.71 | ±71.06 | 626.22 | ±229.20 |
| TG(16:0_18:1_20:3) | 140.87 | ±46.39  | 251.71 | ±25.75 | 203.81 | ±55.17  |
| TG(16:0_18:1_20:4) | 111.76 | ±42.36  | 303.94 | ±52.63 | 172.78 | ±64.28  |
| TG(16:0_18:1_21:0) | 6.60   | ±0.65   | 7.32   | ±1.13  | 7.90   | ±1.19   |
| TG(16:0_18:1_22:0) | 8.48   | ±0.95   | 16.59  | ±4.21  | 12.05  | ±2.68   |
| TG(16:0_18:1_22:6) | 55.45  | ±44.31  | 207.44 | ±64.40 | 120.56 | ±59.85  |
| TG(16:0_18:1_24:0) | 5.03   | ±0.23   | 5.11   | ±0.47  | 6.39   | ±1.05   |
| TG(16:0_18:2_20:4) | 47.29  | ±49.53  | 184.78 | ±62.52 | 76.89  | ±37.81  |
| TG(16:0_18:2_22:6) | 50.94  | ±42.72  | 103.14 | ±50.95 | 41.90  | ±23.56  |
| TG(16:0_18:3_22:6) | 4.47   | ±3.35   | 8.91   | ±6.00  | 2.12   | ±1.34   |
| TG(16:0_20:3_22:6) | 23.34  | ±14.95  | 28.84  | ±12.47 | 14.66  | ±6.32   |
| TG(16:0_20:4_22:6) | 1.48   | ±0.91   | 7.07   | ±6.44  | 3.32   | ±2.12   |
| TG(16:0_22:1_22:6) | 1.21   | ±0.42   | 2.41   | ±0.27  | 2.79   | ±0.96   |
| TG(16:0_22:4_22:6) | 0.85   | ±0.34   | 3.28   | ±2.41  | 2.67   | ±0.96   |
| TG(16:0_22:5_22:6) | 1.85   | ±1.18   | 4.28   | ±2.82  | 2.34   | ±0.96   |
| TG(16:0_22:6_22:6) | 0.69   | ±0.54   | 2.18   | ±1.65  | 0.95   | ±0.60   |
| TG(16:1_14:0_16:1) | 23.92  | ±2.56   | 12.34  | ±2.09  | 14.37  | ±4.29   |
| TG(16:1_16:1_16:1) | 20.63  | ±4.79   | 18.23  | ±6.59  | 12.22  | ±2.08   |
| TG(16:1_16:1_17:1) | 15.30  | ±1.34   | 7.69   | ±1.71  | 9.71   | ±2.09   |
| TG(16:1_16:1_18:1) | 88.71  | ±50.39  | 230.68 | ±60.72 | 89.54  | ±20.98  |
| TG(16:1_16:1_18:2) | 15.78  | ±11.28  | 50.82  | ±18.48 | 9.82   | ±2.26   |
| TG(16:1_16:1_18:3) | 0.81   | ±0.47   | 4.32   | ±1.69  | 0.81   | ±0.45   |
| TG(16:1_17:1_18:1) | 27.30  | ±2.64   | 41.59  | ±6.12  | 23.89  | ±2.72   |
| TG(16:1_18:1_18:2) | 222.16 | ±144.73 | 531.97 | ±87.22 | 248.66 | ±115.22 |
| TG(16:1_18:1_23:0) | 3.90   | ±0.34   | 6.10   | ±1.14  | 4.97   | ±0.63   |
| TG(16:1_18:2_18:2) | 41.87  | ±34.23  | 135.99 | ±45.34 | 32.27  | ±18.26  |
| TG(16:1_18:2_18:3) | 3.00   | ±2.73   | 13.62  | ±7.11  | 2.18   | ±1.23   |
| TG(16:1_18:2_20:4) | 13.10  | ±17.28  | 46.47  | ±22.96 | 8.45   | ±5.08   |
| TG(17:0_18:1_18:1) | 18.76  | ±1.97   | 44.61  | ±9.21  | 26.86  | ±5.41   |
| TG(17:0_18:1_20:3) | 4.57   | ±0.58   | 5.31   | ±0.84  | 4.10   | ±0.66   |
| TG(18:0_16:0_16:0) | 36.32  | ±10.44  | 24.26  | ±7.87  | 38.20  | ±15.29  |
| TG(18:0_16:0_18:0) | 18.87  | ±3.07   | 17.38  | ±5.08  | 19.30  | ±5.85   |
| TG(18:0_16:0_18:1) | 50.38  | ±27.56  | 141.84 | ±34.02 | 107.44 | ±31.09  |
| TG(18:0_17:0_18:1) | 10.81  | ±1.42   | 10.31  | ±1.64  | 10.01  | ±1.93   |
| TG(18:0_18:0_18:0) | 10.33  | ±1.86   | 9.25   | ±2.93  | 10.58  | ±2.98   |
| TG(18:0_18:0_18:1) | 15.10  | ±3.71   | 78.80  | ±22.94 | 35.41  | ±6.84   |
| TG(18:0_18:0_22:4) | 4.72   | ±0.63   | 11.12  | ±1.00  | 6.63   | ±3.11   |
| TG(18:0_18:1_18:1) | 50.05  | ±21.18  | 238.84 | ±55.12 | 135.78 | ±35.02  |
| TG(18:0_18:1_20:3) | 21.43  | ±3.59   | 42.50  | ±5.24  | 34.03  | ±6.74   |
| TG(18:0_18:1_20:4) | 27.70  | ±8.02   | 102.55 | ±16.01 | 75.49  | ±25.90  |
| TG(18:0_18:1_22:5) | 6.72   | ±2.06   | 21.87  | ±3.52  | 18.17  | ±5.40   |
| TG(18:0_18:1_22:6) | 10.25  | ±4.40   | 26.77  | ±4.28  | 23.42  | ±9.52   |
| TG(18:1_17:1_18:2) | 9.01   | ±2.58   | 18.78  | ±2.90  | 9.42   | ±2.40   |

|                    |        |        |        |        |        |        |
|--------------------|--------|--------|--------|--------|--------|--------|
| TG(18:1_18:1_18:1) | 112.18 | ±39.65 | 226.62 | ±19.91 | 208.59 | ±52.34 |
| TG(18:1_18:1_20:4) | 36.67  | ±16.90 | 135.30 | ±23.63 | 97.00  | ±40.19 |
| TG(18:1_18:1_22:0) | 5.64   | ±0.42  | 12.86  | ±2.67  | 8.55   | ±0.38  |
| TG(18:1_18:1_22:1) | 4.90   | ±0.71  | 16.21  | ±3.74  | 8.07   | ±2.02  |
| TG(18:1_18:2_22:5) | 19.77  | ±11.67 | 41.26  | ±11.95 | 30.92  | ±10.69 |
| TG(18:2_17:1_18:2) | 2.66   | ±1.46  | 5.66   | ±2.09  | 2.91   | ±0.83  |
| TG(18:2_18:2_18:2) | 65.77  | ±24.28 | 57.27  | ±20.04 | 18.27  | ±6.23  |
| TG(18:2_18:2_22:6) | 10.19  | ±7.53  | 5.11   | ±2.75  | 2.25   | ±0.91  |
| TG(18:3_18:2_18:2) | 8.50   | ±9.93  | 28.69  | ±11.21 | 7.26   | ±4.42  |
| TG(19:0_18:1_18:1) | 6.35   | ±0.86  | 12.22  | ±2.57  | 7.87   | ±1.08  |
| TG(19:1_18:1_18:1) | 6.43   | ±1.11  | 10.87  | ±2.22  | 6.85   | ±1.07  |
| TG(20:0_18:1_18:1) | 11.21  | ±1.99  | 62.61  | ±17.40 | 24.14  | ±4.53  |
| TG(20:0_18:1_20:4) | 5.01   | ±1.27  | 13.46  | ±1.52  | 12.28  | ±2.18  |
| TG(20:1_18:1_18:1) | 16.85  | ±5.66  | 75.26  | ±15.75 | 37.06  | ±10.26 |

---

**Supplementary Table S2.** Deferential hepatic lipid species between HF vs Con based on the criteria of VIP  $\geq 1$  and P<0.05.

| Lipid compounds    | HF vs Con |      |        | Lipid compounds    | HF vs Con |      |       |
|--------------------|-----------|------|--------|--------------------|-----------|------|-------|
|                    | aVIP      | bFC  | cTrend |                    | VIP       | FC   | Trend |
| TG(16:0_22:1_22:6) | 1.12      | 1.99 | ↑      | TG(16:0_16:0_16:0) | 1.20      | 0.18 | ↓     |
| TG(16:0_18:1_22:0) | 1.10      | 1.95 | ↑      | TG(15:0_16:0_16:0) | 1.23      | 0.17 | ↓     |
| TG(18:0_18:1_20:3) | 1.23      | 1.98 | ↑      | TG(15:0_14:0_16:0) | 1.16      | 0.16 | ↓     |
| TG(19:0_18:1_18:1) | 1.13      | 1.93 | ↑      | TG(16:0_14:0_16:0) | 1.27      | 0.14 | ↓     |
| TG(16:0_18:1_20:3) | 1.11      | 1.79 | ↑      | TG(15:0_16:0_18:1) | 1.24      | 0.38 | ↓     |
| TG(19:1_18:1_18:1) | 1.08      | 1.69 | ↑      | TG(15:0_17:1_17:1) | 1.26      | 0.35 | ↓     |
| TG(16:1_18:1_23:0) | 1.07      | 1.56 | ↑      | TG(16:0_14:0_16:1) | 1.14      | 0.34 | ↓     |
| TG(16:1_17:1_18:1) | 1.14      | 1.52 | ↑      | TG(16:0_16:0_16:1) | 1.15      | 0.34 | ↓     |
| TG(15:0_18:1_18:1) | 1.04      | 1.44 | ↑      | TG(15:0_16:1_16:1) | 1.20      | 0.36 | ↓     |
| TG(18:0_18:1_22:6) | 1.16      | 2.61 | ↑      | TG(16:0_16:0_17:0) | 1.20      | 0.26 | ↓     |
| TG(16:0_18:1_22:6) | 1.07      | 3.74 | ↑      | TG(15:0_16:0_16:1) | 1.17      | 0.24 | ↓     |
| TG(18:0_18:1_22:5) | 1.23      | 3.25 | ↑      | DG(18:2_22:6)      | 1.06      | 0.22 | ↓     |
| TG(18:0_18:0_22:4) | 1.27      | 2.36 | ↑      | PC(18:0_18:2)      | 1.10      | 0.49 | ↓     |
| TG(18:1_18:1_22:1) | 1.21      | 3.31 | ↑      | PC(17:1_20:5)      | 1.18      | 0.48 | ↓     |
| TG(18:1_18:1_22:0) | 1.18      | 2.28 | ↑      | PC(32:0)           | 1.25      | 0.38 | ↓     |
| TG(20:0_18:1_18:1) | 1.21      | 5.58 | ↑      | PC(34:3)           | 1.25      | 0.19 | ↓     |
| TG(20:1_18:1_18:1) | 1.24      | 4.47 | ↑      | PC(34:2)           | 1.25      | 0.30 | ↓     |
| TG(20:0_18:1_20:4) | 1.26      | 2.69 | ↑      | PC(35:2)           | 1.10      | 0.36 | ↓     |
| TG(18:0_18:0_18:1) | 1.20      | 5.22 | ↑      | PC(36:5)           | 1.22      | 0.21 | ↓     |
| TG(18:0_18:1_18:1) | 1.23      | 4.77 | ↑      | PC(40:8)           | 1.18      | 0.36 | ↓     |
| TG(16:1_16:1_18:3) | 1.10      | 5.35 | ↑      | PC(40:7)           | 1.18      | 0.48 | ↓     |
| TG(16:0_18:2_20:4) | 1.05      | 3.91 | ↑      | PE(18:1_22:6)      | 1.22      | 0.47 | ↓     |
| TG(16:0_18:1_18:1) | 1.27      | 3.88 | ↑      | PE(18:0_18:2)      | 1.20      | 0.37 | ↓     |
| TG(18:0_18:1_20:4) | 1.24      | 3.70 | ↑      | PE(16:0p_22:6)     | 1.27      | 0.31 | ↓     |
| TG(18:1_18:1_20:4) | 1.21      | 3.69 | ↑      | PE(16:0_18:2)      | 1.27      | 0.27 | ↓     |
| TG(16:1_18:2_18:2) | 1.04      | 3.25 | ↑      | PE(18:1_18:2)      | 1.22      | 0.26 | ↓     |
| TG(16:1_16:1_18:2) | 1.04      | 3.22 | ↑      | LPC(16:0)          | 1.14      | 0.47 | ↓     |
| TG(18:0_16:0_18:1) | 1.13      | 2.82 | ↑      | LPC(18:2)          | 1.16      | 0.29 | ↓     |
| TG(16:0_18:1_20:4) | 1.18      | 2.72 | ↑      | LPE(16:0)          | 1.09      | 0.41 | ↓     |
| TG(16:0_18:1_18:2) | 1.19      | 2.63 | ↑      | LPE(18:1)          | 1.10      | 0.43 | ↓     |
| TG(16:1_16:1_18:1) | 1.10      | 2.60 | ↑      | LPE(22:6)          | 1.03      | 0.39 | ↓     |
| TG(16:1_18:1_18:2) | 1.08      | 2.39 | ↑      | SM(d18:1_24:1)     | 1.26      | 0.35 | ↓     |
| TG(17:0_18:1_18:1) | 1.20      | 2.38 | ↑      | SM(d41:1)          | 1.19      | 0.30 | ↓     |
| TG(18:1_17:1_18:2) | 1.17      | 2.08 | ↑      | SM(d42:1)          | 1.23      | 0.23 | ↓     |
| TG(18:1_18:1_18:1) | 1.18      | 2.02 | ↑      | Cer(d18:1_24:1)    | 1.16      | 0.28 | ↓     |
| DG(18:1_18:1)      | 1.14      | 2.44 | ↑      | Cer(d18:1_24:0)    | 1.07      | 0.24 | ↓     |
| DG(16:0_18:1)      | 1.06      | 2.06 | ↑      | ChE(18:2)          | 1.10      | 0.02 | ↓     |
| PC(40:5)           | 1.02      | 2.01 | ↑      | Co(Q9)             | 1.24      | 0.47 | ↓     |
| PC(38:6)           | 1.20      | 0.54 | ↓      | PC(35:4)           | 1.01      | 0.63 | ↓     |
| PE(16:0_20:4)      | 1.10      | 0.53 | ↓      | PC(32:1)           | 1.02      | 0.59 | ↓     |
| PE(16:0_22:6)      | 1.22      | 0.53 | ↓      | PI(18:0_20:4)      | 1.11      | 0.60 | ↓     |
| Cer(d18:1_16:0)    | 1.03      | 0.52 | ↓      | PE(18:1_20:4)      | 1.05      | 0.57 | ↓     |
| TG(16:1_14:0_16:1) | 1.19      | 0.52 | ↓      | SM(d34:1)          | 1.14      | 0.62 | ↓     |

|                    |      |      |   |                |      |      |   |
|--------------------|------|------|---|----------------|------|------|---|
| TG(16:1_16:1_17:1) | 1.18 | 0.50 | ↓ | SM(d18:1_22:0) | 1.03 | 0.61 | ↓ |
|--------------------|------|------|---|----------------|------|------|---|

---

<sup>a</sup> VIP values obtained from OPLS-DA. <sup>b</sup> Fold change (FC) was calculated based on mean ratios for HF vs Con. <sup>c</sup> The icons of trend represent increase or reduced levels of lipid species between the two groups.

**Supplementary Table S3.** Deferential hepatic lipid species between LC5 vs HF based on the criteria of VIP  $\geq 1$  and P<0.05.

| Lipid compounds    | LC5 vs HF |      |        | Lipid compounds    | LC5 vs HF |      |       |
|--------------------|-----------|------|--------|--------------------|-----------|------|-------|
|                    | aVIP      | bFC  | cTrend |                    | VIP       | FC   | Trend |
| TG(15:0_16:0_18:1) | 1.23      | 2.02 | ↑      | TG(16:1_18:2_18:3) | 1.23      | 0.16 | ↓     |
| TG(15:0_16:0_16:1) | 1.29      | 3.20 | ↑      | TG(16:1_18:2_20:4) | 1.23      | 0.18 | ↓     |
| TG(16:0_16:0_17:0) | 1.32      | 3.24 | ↑      | TG(16:1_16:1_18:3) | 1.35      | 0.19 | ↓     |
| TG(15:0_14:0_16:0) | 1.25      | 4.17 | ↑      | TG(16:1_16:1_18:2) | 1.40      | 0.19 | ↓     |
| TG(16:0_16:0_16:0) | 1.30      | 4.33 | ↑      | TG(16:1_18:2_18:2) | 1.37      | 0.24 | ↓     |
| TG(15:0_16:0_16:0) | 1.39      | 4.59 | ↑      | TG(16:0_18:3_22:6) | 1.02      | 0.24 | ↓     |
| TG(16:0_14:0_16:0) | 1.22      | 5.36 | ↑      | TG(18:3_18:2_18:2) | 1.34      | 0.25 | ↓     |
| TG(16:0_14:0_16:1) | 1.10      | 2.22 | ↑      | TG(18:2_18:2_18:2) | 1.34      | 0.32 | ↓     |
| TG(16:0_18:1_20:4) | 1.24      | 0.57 | ↓      | TG(20:0_18:1_18:1) | 1.42      | 0.39 | ↓     |
| TG(17:0_18:1_18:1) | 1.31      | 0.60 | ↓      | TG(16:1_16:1_18:1) | 1.42      | 0.39 | ↓     |
| TG(18:0_18:0_22:4) | 1.13      | 0.60 | ↓      | TG(15:0_18:2_18:2) | 1.38      | 0.40 | ↓     |
| TG(19:0_18:1_18:1) | 1.29      | 0.64 | ↓      | TG(16:0_18:2_22:6) | 1.01      | 0.41 | ↓     |
| TG(19:1_18:1_18:1) | 1.32      | 0.63 | ↓      | TG(16:0_18:2_20:4) | 1.20      | 0.42 | ↓     |
| TG(18:1_18:1_22:0) | 1.31      | 0.66 | ↓      | TG(18:0_18:0_18:1) | 1.35      | 0.45 | ↓     |
| TG(15:0_18:1_18:1) | 1.12      | 0.76 | ↓      | TG(20:1_18:1_18:1) | 1.40      | 0.49 | ↓     |
| TG(18:1_17:1_18:2) | 1.43      | 0.50 | ↓      | TG(18:1_18:1_22:1) | 1.38      | 0.50 | ↓     |
| TG(18:2_17:1_18:2) | 1.16      | 0.51 | ↓      | TG(16:1_18:1_18:2) | 1.34      | 0.47 | ↓     |
| TG(16:1_17:1_18:1) | 1.46      | 0.57 | ↓      | DG(18:2_18:2)      | 1.15      | 0.46 | ↓     |
| TG(18:0_18:1_18:1) | 1.28      | 0.57 | ↓      | DG(18:1_18:1)      | 1.29      | 0.48 | ↓     |
| DG(16:0_18:1)      | 1.24      | 0.52 | ↓      | DG(16:0_18:2)      | 1.37      | 0.49 | ↓     |
| DG(18:1_18:2)      | 1.23      | 0.53 | ↓      | PC(38:5)           | 1.20      | 1.56 | ↑     |
| DG(18:1_20:4)      | 1.20      | 0.54 | ↓      | PC(40:6)           | 1.23      | 1.57 | ↑     |
| PC(18:0_20:3)      | 1.05      | 0.66 | ↓      | PC(35:2)           | 1.05      | 1.56 | ↑     |
| PC(40:5)           | 1.21      | 2.04 | ↑      | PC(35:4)           | 1.37      | 1.62 | ↑     |
| PC(37:5)           | 1.44      | 2.47 | ↑      | PC(36:4)           | 1.36      | 1.67 | ↑     |
| SM(d34:1)          | 1.26      | 2.05 | ↑      | PC(17:1_20:5)      | 1.39      | 1.61 | ↑     |
| Cer(d18:1_16:0)    | 1.03      | 2.17 | ↑      | PC(38:6)           | 1.45      | 1.78 | ↑     |
| TG(17:0_18:1_20:3) | 1.15      | 0.77 | ↓      | PC(34:2)           | 1.11      | 1.99 | ↑     |
| TG(15:0_17:1_17:1) | 1.15      | 1.99 | ↑      | PC(40:7)           | 1.14      | 1.46 | ↑     |
| PE(18:1_22:6)      | 1.28      | 1.51 | ↑      | PC(38:4)           | 1.18      | 1.49 | ↑     |
| PE(18:0p_20:4)     | 1.11      | 1.58 | ↑      | PI(18:0_20:4)      | 1.32      | 1.67 | ↑     |
| PE(18:1_20:4)      | 1.30      | 1.68 | ↑      | SM(d18:1_24:1)     | 1.11      | 1.52 | ↑     |
| PE(16:0_18:2)      | 1.17      | 1.76 | ↑      | PE(16:0_22:6)      | 1.44      | 1.83 | ↑     |
| PE(16:0_20:4)      | 1.34      | 1.80 | ↑      |                    |           |      |       |

<sup>a</sup> VIP values obtained from OPLS-DA. <sup>b</sup> Fold change (FC) was calculated based on mean ratios for LC5 vs HF. <sup>c</sup> The icons of trend represent increase or reduced levels of lipid species between the two groups.
